# Supplementary material for: Desymmetrization of disubstituted aromatic crown ethersviaintramolecular Cannizzaro reactions
Source: Royal Society of Chemistry journal article supplement (doi:10.1039/c9nj04679h), 2019-01-01
Supplement: c9nj04679h1.pdf [file c9nj04679h1.pdf]

*Electronic Supplemental Information*

**Desymmetrization of Disubstituted Aromatic Crown Ethers via  
Intramolecular Cannizzaro Reactions**

Mason A. Rouser and Harry W. Gibson

Department of Chemistry, Virginia Tech, Blacksburg, VA, USA 24060

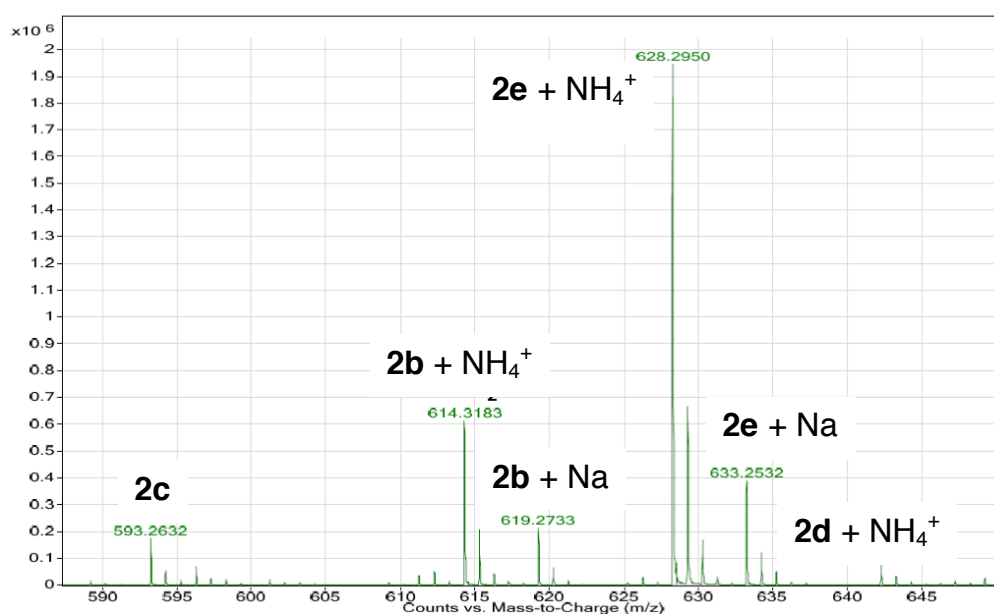

**Figure S1.** High-resolution electrospray ionization mass spectrum of the crude mixture from the Cannizzaro reaction of 4,4'-diformyldibenzo-30-crown-10 (**2c**) using NaOH as the base.
